A1

TITLE: Postoperative Nystagmus and Emesis

AUTHORS: GE Larijani, PharmD, I Gratz, DO,  
S Berman, PhD, S. Zwillenberg, MD

AFFILIATION: Departments of Anesthesiology,  
Audiology, Otolaryngology and  
Pharmacology, Medical College of PA,  
Philadelphia, PA

INTRODUCTION: Nausea and vomiting are common  
sequelae of general anesthesia particularly in  
ambulatory patients. Temporary disturbances in  
vestibular function have been implicated as a  
causative factor in the development of  
postoperative emesis. This study was designed to  
detect the presence of postoperative nystagmus and  
correlate this finding with postoperative emesis.

METHOD: Written informed consents were obtained  
from ASA I-II ambulatory patients scheduled for  
elective surgical procedures under general  
anesthesia to participate in this IRB approved  
study. No attempt was made to standardize the  
premedication or the anesthetic technique except  
for exclusion of perioperative antiemetics. In the  
recovery room and the short procedure unit, the  
patients were tested for the presence of nystagmus  
using a standard electronystagmograph (ENG). Two  
electrodes were placed lateral to the outer canthus  
of the eye with a ground electrode placed on the  
forehead. The ENG was calibrated for each reading  
by asking the patient to look at 2 different  
targets placed 4 feet away at 30 degrees to the  
left and to the right. Eye motion was measured by  
asking the patient to follow the movement of a pen  
from side to side (pendular tracking) and after  
closing the eyes and moving the head side to side  
(Hallpike maneuver). Patients were frequently  
observed for the presence of nausea and vomiting  
while in the hospital. A telephone call 24 hrs  
later was also made for evaluation of emetic  
symptoms at home. Data was analyzed using 95% CI  
and is reported as mean (SD).

RESULTS: 42 patients (31 female) participated in  
this study. All patients except one had received  
thiopental, N<sub>2</sub>O/O<sub>2</sub>, midazolam, isoflurane, fentanyl  
and a muscle relaxant for their anesthetic  
management. As expected significantly more female  
than male patients complained of postoperative  
nausea in the hospital (13 of 31 vs. 1 of 11, 95%  
CI = 8.6% to 57.1%) or at home (11 of 31 vs. 1 of  
11, 95% CI = 2.5% to 50.3%). Furthermore,  
significantly more patients complaining of  
postoperative nausea in the hospital had nystagmus  
than those who did not (10 of 14 vs. 8 of 28, 95%  
CI = 14% to 72%). In addition, significantly more  
patients who had nystagmus complained of emesis at  
home as compared to those who did not have  
nystagmus (9 of 18 vs. 3 of 24, 95% CI = 11% to  
64%).

DISCUSSION: Postoperative nystagmus is  
significantly more common in patients who complain  
of postoperative nausea and vomiting during the  
first postoperative day. The presence of nystagmus  
in these patients is another indication that  
temporary disturbances in vestibular function  
caused by anesthetics is an important factor in the  
development of postoperative emesis.

A2

VOMITING AFTER ALFENTANIL - EFFECT OF DOSING METHOD  
G Okum MD, P Colonna-Romano MD, JC Horrow MD  
Dept. of Anesthesiology, Hahnemann Univ, Phila., PA 19102

Administration of alfentanil by infusion, as opposed to intermit-  
tent bolus, permits more rapid awakening and less frequent use of  
naloxone.<sup>1</sup> Nausea and vomiting (NV) also may be related to the  
mode of administration. We tested this hypothesis with a double  
blind, randomized study in patients at high risk for NV.<sup>2-3</sup>

METHODS

With IRB approval, 40 women for elective lower abdominal  
gynecologic or laparoscopic procedures, ASA I or II, gave  
informed consent for sequential randomization to a bolus (B) or an  
infusion (I) group. All patients received iv glycopyrrolate, metho-  
hexital, and vecuronium at induction of anesthesia. N<sub>2</sub>O in O<sub>2</sub>  
and vecuronium maintained anesthesia and muscle relaxation.  
Group B patients received alfentanil 30 µg·kg<sup>-1</sup> iv push on induc-  
tion followed by 10 µg·kg<sup>-1</sup> iv push every 10 min until conclusion  
of their procedure. Group I received alfentanil as 30 µg·kg<sup>-1</sup> over  
1 min, followed by 1 µg·kg<sup>-1</sup>·min<sup>-1</sup> until conclusion of surgery.  
During recovery, a nurse blinded to the patient's group assignment  
assessed her for the presence of NV, need for anti-emetics, and  
prolonged recovery room (PACU) stay. Patients who vomited  
more than once or who complained of nausea after vomiting  
received prochlorperazine or benzquinimide. Prolonged PACU stay  
was defined as >2 hrs. Two-tailed unpaired Student's t-test  
compared demographic data. Multinomial logistic regression ana-  
lyzed the contributions of group, kind of surgery, and their inter-  
action on NV, anti-emetic use, and prolonged PACU stay.

RESULTS

Patient groups did not differ with respect to demographic vari-  
ables. Laparoscopy accounted for 16 procedures; the remaining  
24 featured either an abdominal or vaginal incision. Multinomial  
logistic regression identified strong effects of both group and kind  
of surgery on NV: patients in the infusion group suffered a higher  
incidence of NV, as did laparoscopy patients. Infusion of alf-  
entanil during laparoscopy combined synergistically to cause NV  
(Table). Type of surgery and method of alfentanil administration  
did not affect the need for anti-emetic. Four patients experienced  
prolonged PACU stay: all underwent laparoscopy; 3 received alf-  
entanil by infusion. Laparoscopic surgery (P<.0001 v. incisional)  
and infusion of alfentanil (P<.02 v. bolus) prolonged PACU stay.

Table. Incidence of nausea with vomiting after alfentanil

| GROUP:       | BOLUS                | INFUSION            | TOTAL           |
|--------------|----------------------|---------------------|-----------------|
| Laparoscopy: | 6 of 10              | 6 of 6 <sup>†</sup> | 12 of 16* (75%) |
| Incisional:  | 0 of 10 <sup>‡</sup> | 4 of 14             | 4 of 24* (17%)  |
| TOTAL:       | 6 of 20† (30%)       | 10 of 20†(50%)      | 16 of 40        |

\*P<.0001 laparoscopy v. incisional; †P<.0001 bolus v. infusion

‡P<.0001 synergistic effect of infusion with laparoscopy

DISCUSSION

These data confirm increased NV following laparoscopy.<sup>2,3</sup> Why  
is infusion, not bolus administration of alfentanil, associated with  
more post-operative NV? Perhaps intermittent administration per-  
mits sporadic egress of opioid from medullary sites responsible  
for NV. Although previous work showed no difference (bolus v.  
infusion) in anti-emetic requirement after alfentanil,<sup>1</sup> that study  
comprised only 10 patients per group, none undergoing laparo-  
scopy, and utilized higher doses of alfentanil (~150 µg/kg). Also,  
anti-emetic use does not always follow NV. Many patients are  
nauseated without vomiting or vomit once with relief of nausea.  
Is NV a problem of sufficient magnitude to prolong PACU stay?  
Since only 4 patients (25% of those nauseated) experienced a pro-  
longed PACU stay, these data cannot answer that question, nor  
any possible benefit of anti-emetic prophylaxis. Alfentanil is  
associated with a high incidence of NV during laparoscopy in  
women, particularly when given by continuous infusion.

References:

1. Anesthesiology 68:851,1988;
2. Can Anaesth Soc J 31:178,1984; 3. Anaesthesia 41:537,1986.
